# Supplementary material
Source: PubMed Central journal article supplement (PMC3730909)
Supplement: 8cb73b1923280982f4c1ea5b766563a8_genetics.113.152710-3.pdf [file 8cb73b1923280982f4c1ea5b766563a8_genetics.113.152710-3.pdf]

## A. pHsp70-Cas9

DmHsp70 promoter and 3'UTR

3x Flag

NLS

Cas9

```
ATCCCCCTAGAATCCCAAACAAACTGGTTATTGTGGTAGGTCATTTGTTTGGCAGAAAGAAAA
CTCGAGAAATTTCTCTGGCCGTTATTCGTTATTCTCTCTTTTTCTTTTTGGGTCTCTCCCTCTCT
GACTAATGCTCTCTCACTCTGTACACAGTAAACGGCATACTGCTCTCGTTGGTTCGAGAGAG
CGCGCCTCGAATGTTTCGCGAAAAGAGCGCCGGAGTATAAATAGAGGCGCTTCGTCTACGGAGCG
ACAATTCAATTCAAACAAGCAAAGTGAACACGTCGCTAAGCGAAAGCTAAGCAAATAAACAAGC
GCAGCTGAACAAGCTAAACAATCTGCAGTAAAGTGCAAGTTAAAGTGAATCAATTAAGTAAC
CAGCAACCAAGTAAATCAACTGCAACTACTGAAATCTGCCAAGAAGTAATTATTGAATACAAGA
AGAGAACTCTGGGGGATCTGATCGATATGGACTATAAGGACCACGACGGAGACTACAAGGATCA
TGATATTGATTACAAAGACGATGACGATAAGATGGCCCCAAAGAAGAAGCGGAAGGTCGGTATC
CACGGAGTCCCAGCAGCCGACAAGAAGTACAGCATCGGCCTGGACATCGGCACCAACTCTGTGG
GCTGGGCCGTGATCACCGACGAGTACAAGGTGCCAGCAAGAAATTCAGGTGCTGGGCAACAC
CGACCGGCACAGCATCAAGAAGAACCCTGATCGGAGCCCTGCTGTTTCGACAGCGGCAGAACAGCC
GAGGCCACCCGGCTGAAGAGAACC GCCAGAAGAAGATACACCAGACGGAAGAACC GGATCTGCT
ATCTGCAAGAGATCTTCAGCAACGAGATGGCCAAGGTGGACGACAGCTTCTTCCACAGACTGGA
AGAGTCCTTTCCTGGTGGAAAGAGGATAAGAAGCACGAGCGGCACCCCATCTTCGGCAACATCGTG
GACGAGGTGGCCTACCACGAGAAGTACCCACCATCTACCACCTGAGAAAGAACTGGTGGACA
GCACCGACAAGGCCGACCTGCGGCTGATCTATCTGGCCCTGGCCACATGATCAAGTTCGGGG
CCACTTCTGATCGAGGGCGACCTGAACCCCGACAACAGCGACGTGGACAAGCTGTTTCATCCAG
CTGGTGCAGACCTACAACCAGCTGTTTCGAGGAAAACCCCATCAACGCCAGCGGCGTGGACGCCA
AGGCCATCCTGTCTGCCAGACTGAGCAAGAGCAGACGGCTGGAAAATCTGATCGCCCAGCTGCC
CGGCGAGAAGAAGAATGGCCTGTTTCGGAAACCTGATTGCCCTGAGCCTGGGCCTGACCCCAAC
TTCAAGAGCAACTTCGACCTGGCCGAGGATGCCAACTGCAGCTGAGCAAGGACACCTACGACG
ACGACCTGGACAACCTGCTGGCCAGATCGGCGACCAGTACGCCGACCTGTTTCTGGCCGCCAA
GAACCTGTCCGACGCCATCCTGCTGAGCGACATCCTGAGAGTGAACACCGAGATCACCAAGGCC
CCCCTGAGCGCCTCTATGATCAAGAGATACGACGAGCACCACCAGGACCTGACCCTGCTGAAAG
CTCTCGTGCAGCAGCTGCCTGAGAAGTACAAAGAGATTTTCTTCGACCAGAGCAAGAACGG
CTACGCCGCTACATTGACGGCGGAGCCAGCCAGGAAGAGTTCTACAAGTTCATCAAGCCATC
CTGAAAAGATGGACGGCACCAGGAACTGCTCGTGAAGCTGAACAGAGAGGACCTGCTGCGGA
AGCAGCGGACCTTCGACAACGGCAGCATCCCCACCAGATCCACCTGGGAGAGCTGCACGCCAT
TCTGCGGCGGCAGGAAGATTTTTACCCATTCTGAAGGACAACCGGGAAAAGATCGAGAAGATC
CTGACCTTCCGCATCCCCTACTACGTGGGCCCTCTGGCCAGGGGAAACAGCAGATTCGCCTGGA
TGACCAGAAAGAGCGAGGAAACCATCACCCCTGGAACCTTCGAGGAAAGTGGTGGACAAGGGCGC
TTCCGCCAGAGCTTCATCGAGCGGATGACCAACTTCGATAAGAACCTGCCCAACGAGAAGGTG
CTGCCAAGCACAGCCTGCTGTACGAGTACTTCACCGTGTATAACGAGCTGACCAAAGTGAAT
ACGTGACCGAGGGAATGAGAAAGCCGCCTTCTGAGCGGCGAGCAGAAAAGGCCATCGTGGA
CCTGCTGTTCAAGACCAACCGGAAAGTGACCGTGAAGCAGCTGAAAGAGGACTACTTCAAGAAA
ATCGAGTGCTTCGACTCCGTGGAAATCTCCGGCGTGAAGATCGGTTCAACGCCTCCCTGGGCA
CATAACCAGATCTGCTGAAAATTATCAAGGACAAGGACTTCTGGACAATGAGGAAAACGAGGA
CATTCTGGAAGATATCGTGTGACCCTGACACTGTTTGGAGACAGAGAGATGATCGAGGAACGG
CTGAAAACCTATGCCACCTGTTTCGACGACAAAGTGATGAAGCAGCTGAAGCGGCGGAGATACA
CCGGCTGGGGCAGGCTGAGCCGGAAGCTGATCAACGGCATCCGGGACAAGCAGTCCGGCAAGAC
AATCCTGGATTTCTGAAGTCCGACGGCTTCGCCAACAGAACTTCATGCAGCTGATCCACGAC
```

GACAGCCTGACCTTTTAAAGAGGACATCCAGAAAGCCCAGGTGTCCGGCCAGGGCGATAGCCTGC  
ACGAGCACATTGCCAATCTGGCCGGCAGCCCCGCCATTAAGAAGGGCATCCTGCAGACAGTGAA  
GGTGGTGGACGAGCTCGTGAAAAGTGATGGGCCGGCACAAGCCCAGAACATCGTGATCGAAATG  
GCCAGAGAGAACCAGACCACCCAGAAGGGACAGAAGAACAGCCGCGAGAGAATGAAGCGGATCG  
AAGAGGGCATCAAAGAGCTGGGCAGCCAGATCCTGAAAGAACACCCCGTGGAAAACACCCAGCT  
GCAGAACGAGAAGCTGTACCTGTACTACCTGCAGAAATGGGCGGGATATGTACGTGGACCAGGAA  
CTGGACATCAACCGGCTGTCCGACTACGATGTGGACCATATCGTGCCTCAGAGCTTTCTGAAGG  
ACGACTCCATCGACAACAAGGTGCTGACCAGAAGCGACAAGAACCAGGGGCAAGAGCGACAACGT  
GCCCTCCGAAGAGGTCTGTGAAGAAGATGAAGAACTACTGGCGGCAGCTGCTGAACGCCAAGCTG  
ATTACCCAGAGAAAGTTCGACAATCTGACCAAGGCCGAGAGAGGCGGCCTGAGCGAACTGGATA  
AGGCCGGCTTCATCAAGAGACAGCTGGTGGAAACCCGGCAGATCACAAGCACGTGGCACAGAT  
CCTGGACTCCCGGATGAACACTAAGTACGACGAGAATGACAAGCTGATCCGGGAAGTGAAAGTG  
ATCACCTGAAGTCCAAGCTGGTGTCCGATTTCCGGAAGGATTTCCAGTTTTACAAAGTGCGCG  
AGATCAACAACACTACCACCACGCCACGACGCCTACCTGAACGCCGTCGTGGGAACCGCCCTGAT  
CAAAAAGTACCCTAAGCTGGAAAGCGAGTTCGTGTACGGCGACTACAAGGTGTACGACGTGCGG  
AAGATGATCGCCAAGAGCGAGCAGGAAATCGGCAAGGCTACCGCCAAGTACTTCTTCTACAGCA  
ACATCATGAACTTTTTCAAGACCGAGATTACCCTGGCCAACGGCGAGATCCGGAAGCGGCCTCT  
GATCGAGACAAACGGCGAAACCGGGGAGATCGTGTGGGATAAAGGGCCGGGATTTTGCCACCGTG  
CGGAAAGTGCTGAGCATGCCCAAGTGAATATCGTGAAAAGACCGAGGTGCAGACAGGCGGCT  
TCAGCAAAGAGTCTATCCTGCCCAAGAGGAAACAGCGATAAGCTGATCGCCAGAAAGAAGGACTG  
GGACCCTAAGAAGTACGGCGGCTTCGACAGCCCCACCGTGGCCTATTCTGTGCTGGTGGTGGCC  
AAAGTGAAAAGGGCAAGTCCAAGAACTGAAGAGTGTGAAAAGAGCTGCTGGGGATCACCATCA  
TGAAAAGAAGCAGCTTCGAGAAGAATCCCATCGACTTTCTGGAAGCCAAGGGCTACAAAGAAGT  
GAAAAGGACCTGATCATCAAGCTGCCTAAGTACTCCCTGTTTCGAGCTGGAAAACGGCCGGAAG  
AGAATGCTGGCCTCTGCCGGCGAACTGCAGAAAGGAAACGAACTGGCCCTGCCCTCCAAATATG  
TGAACCTCCTGTACCTGGCCAGCCACTATGAGAAGCTGAAGGGCTCCCCCGAGGATAATGAGCA  
GAAACAGCTGTTTGTGGAACAGCACAAAGCACTACCTGGACGAGATCATCGAGCAGATCAGCGAG  
TTCTCCAAGAGAGTGATCCTGGCCGACGCTAATCTGGACAAAGTGCTGTCCGCCTACAACAAGC  
ACCGGGATAAGCCCATCAGAGAGCAGGCCGAGAATATCATCCACCTGTTTACCCTGACCAATCT  
GGGAGCCCCTGCCGCCTTCAAGTACTTTGACACCACCATCGACCGGAAGAGGTACACCAGCACC  
AAAGAGGTGCTGGACGCCACCCTGATCCACCAGAGCATCACCGGCCTGTACGAGACACGGATCG  
ACCTGTCTCAGCTGGGAGGCGACAAAAGGCCGGCGGCCACGAAAAGGCCGGCCAGGCAAAAAA  
GAAAAGTAATCTAGAGATCTTCCATACCTACCAGTTCTGCGCCTGCAGCAATGGCAACAACGT  
TGCCCGGATCGAGGTCGACTAAGGCCAAAGAGTCTAATTTTTGTTTCATCAATGGGTTATAACAT  
ATGGGTTATATTATAAGTTTTGTTTTAAGTTTTTTGAGACTGATAAGAATGTTTTCGATCGAATATT  
CCATAGAACAACAATAGTATTACCTAATTACCAAGTCTTAATTTAGCAAAAATGTTATTGCTTA  
TAGAAAAAATAAATTATTTATTTGAAATTTAAAGTCAACTTGTCAATTAATGTCTTTGTAGACTT  
TTGAAAGTCTTACGATACAATTAGTATCTAATATACATGGGTTTCATTCTACATTCTATATTAGT  
GATGATTTCTTTAGCTAGTAATACATTTTAATTATATTCGGCTTTGATGATTTTCTGATTTTTT  
CCGAACGGATTTTCGTAGACCCTTTCGATCTCATAATGGCTCATTTTTATTGCGATGGACGGTCA  
GGAGAGCTCCACTTTTGAATTTCTGTTTCGACAGACACCGCATTTGTAGCACATAGCCGGGACATC  
CGTTTTGGGGAGATTTTCCAGTCTCTGTTGCAATTGGTTTTTCGGGAATGCGTTGCAGGCGCATA  
CGCTCTATATCCTCCGAACGGCGCTGGTTGACCCTAGCATTACATAAGGATCAGCAGCAAAAT  
TTGCCTCTACTTCATTGCCCGGAATCACAGCAATCAGATGTCCCTTTTCGGTTACGATGGATATT  
CAGGTGCGAACCGCACACAAAGCTCTCGCCGCACACTCCACACTGATATGGTTCGCTCGCCCGTG  
TGCGCGCCGATATGGATCTTAAGGTCGTTGGACTGCACAAAGCTCTTGCTGCACATTTTGCAGG  
AGTACGGCCTTTGACCCGTGTGCAATCGCATGTGTGCGCCAGCTTGTTCTGCGAAATAAACTA  
ACGGGAATTCCTGCAGCCCCGGGGATCCGCGGCCGC

## B. chiRNA expression vector pU6-BbsI-chiRNA

Dm snRNA:U6:96Ab promoter

BbsI sites for inserting guide sequence

crRNA repeat-derived sequence

tracrRNA

U6 terminator

```
GTTTCGACTTGCAGCCTGAAATACGGCACGAGTAGGAAAAGCCGAGTCAAATGCCGAATGCAGAG
TCTCATTACAGCACAATCAACTCAAGAAAACTCGACACTTTTTTACCATTTGCACTTAAATCC
TTTTTTATTTCGTTATGTATACTTTTTTTGGTCCCTAACCAAACAAAACCAAACCTCTCTTAGTC
GTGCCTCTATATTTAAAACCTATCAATTTATTATAGTCAATAAATCGAACTGTGTTTTCAACAAA
CGAACAATAGGACACTTTGATTCTAAAGGAAAATTTGAAAATCTTAAGCAGAGGGTTCTTAAGA
CCATTTGCCAATTCTTATAATTCTCAACTGCTCTTTCCTGATGTTGATCATTATATAGGTATG
TTTTCTCAATACTTCGGGTCTTCGAGAAGACCTGTTTTAGAGCTAGAAATAGCAAGTTAAAAT
AAGGCTAGTCCGTTATCAACTTGAAAAAGTGGACCCGAGTCGGTGC
```

## C. yellow ssODN

5' and 3' homology arms

PAM

Target sequence corresponding to the nt that remain after cleavage

attP

```
GTTGTCTTTAAATATTCTTTACATCAATCGAGTGTGTGAGAATATACCCAAGTACCGTGTCTAC
GCCCCAACTGAGAGAACTCAAAGGTTACCCAGTTGGGGCACTACATCAGGTGGCTTATGCTG
TTCCCATAGATCGCCAACCTTTCGTTTTGTCTTCCATGATT
```

**Figure S2** Sequences of CRISPR RNA/Cas9 constructs

Annotated sequences of (A) codon-optimized Cas9 (Cong *et al.* 2013) under the control of the *Drosophila* *hsp70* promoter and 3' UTR. (B) chiRNA expression vector for generating site-specific, U6-driven chiRNAs (based on Cong *et al.*, 2013), and (C) the ssODN donor used to replace *yellow* with attP.
