# Supplementary material
Source: PubMed Central journal article supplement (PMC3730909)
Supplement: 68d2f5410cd928803e0eb83de70ae45d_genetics.113.152710-5.pdf [file 68d2f5410cd928803e0eb83de70ae45d_genetics.113.152710-5.pdf]

### Supporting references

Cong, L., F. A. Ran, D. Cox, S. Lin, R. Barretto *et al.*, 2013 Multiplex genome engineering using CRISPR/Cas systems. *Science* 339: 819-823.

Jinek, M., K. Chylinski, I. Fonfara, M. Hauer, J. A. Doudna *et al.*, 2012 A programmable dual-RNA-guided DNA endonuclease in adaptive bacterial immunity. *Science* 337: 816-821.

Wakiyama, M., T. Matsumoto and S. Yokoyama, 2005 *Drosophila* U6 promoter-driven short hairpin RNAs effectively induce RNA interference in Schneider 2 cells. *Biochem Biophys Res Commun* 331: 1163-1170.
