# Supplementary material
Source: PubMed Central journal article supplement (PMC3730909)
Supplement: 864264e06322615925a1df377e21bfaf_genetics.113.152710-2.pdf [file 864264e06322615925a1df377e21bfaf_genetics.113.152710-2.pdf]

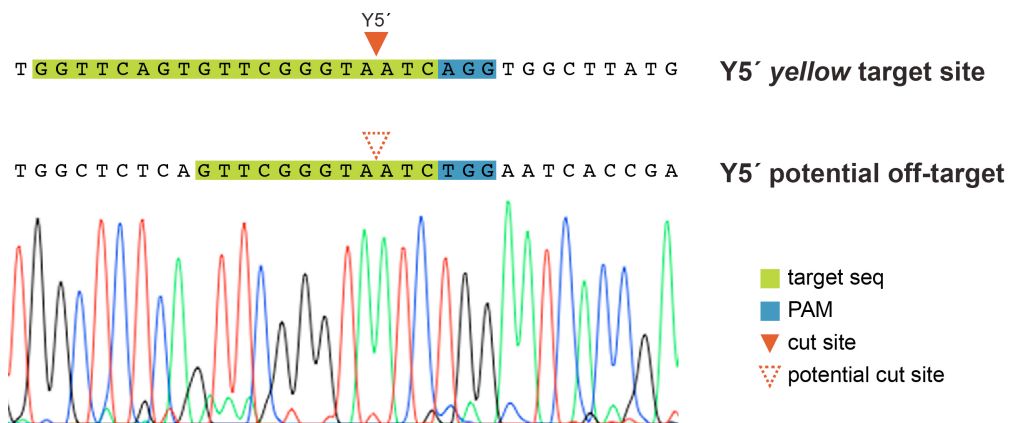

**Figure S3** Off-target analysis of germline transformants

The potential off-target site of Y5', based on the criteria established by Cong et al., 2013, is shown with a representative sequence trace indicating the presence of wild-type sequence at this site in germline transformants generated with the Y5' chiRNA. Note that Y3' and YE1 have no potential off-target sites that meet these criteria.
