# Supplementary material
Source: PubMed Central journal article supplement (PMC3730909)
Supplement: bfe895c9e8e1d425983c677f7de605f7_genetics.113.152710-1.pdf [file bfe895c9e8e1d425983c677f7de605f7_genetics.113.152710-1.pdf]

## Materials and methods

### Molecular reagents

phsp70-Cas9: Sequence encoding 3X Flag-NLS-Cas9-NLS was amplified from pX330 (Cong *et al.* 2013) and cloned as a Clal/XbaI fragment between the *Drosophila hsp70* promoter and 3' UTR in pHSS6hslMi20 (a gift from Anastasios Pavlopoulos). For annotated sequence, see Supporting Information Figure S2A. Expression of Cas9 in embryos was confirmed by immunoblotting.

pU6-BbsI-chiRNA: The chiRNA sequence was placed under control of the *Drosophila* snRNA:U6:96Ab promoter for in vivo transcription (Wakiyama *et al.* 2005). The U6-chiRNA backbone was synthesized as a gBlock gene fragment (Integrated DNA Technologies) and blunt-end ligated into the EcoRV site of pBluescript SK(-). The resulting vector contains two BbsI cut sites to facilitate insertion of target-specific sequences (for annotated sequence, see Supporting Information Figure S2B). Target-specific sequences for *yellow* and *rosy* were synthesized as 5'-phosphorylated oligonucleotides, annealed and ligated into the BbsI sites of pU6-BbsI-chiRNA.

**Donor template.** The single-stranded DNA oligonucleotide (ssODN) donor template for homologous recombination was designed to contain 60-nt of homology directly adjacent to each Cas9-mediated DSB in the target locus flanking a 50-nt attP docking site (for annotated sequence, see Supporting Information Figure S2C). The ssODN was synthesized by Integrated DNA Technologies.

### Embryo injections

*w*<sup>1118</sup> preblastoderm embryos were injected through the chorion membrane using standard protocols. phsp70-Cas9 was injected at a concentration of 500 ng/ $\mu$ L. The pU6-chiRNA targeting constructs were injected at 500 ng/ $\mu$ L for single chiRNAs and 250 ng/ $\mu$ L each when two chiRNAs were injected. The donor template ssODN was diluted based on manufacturer's concentrations and injected at 100 ng/ $\mu$ L. All injection mixtures were prepared in water. Average embryonic survival following injection with Cas9 and a single chiRNA was 50%. Embryonic survival rates following multiplex injections of 2 chiRNAs with and without the ssODN donor were 68 and 69%, respectively. While this difference likely reflects improved quality of injections rather than the differences in the injection components, these rates indicate that expression of the components of the CRISPR RNA/Cas9 system does not significantly impair development.

### **SURVEYOR assay**

Analysis of NHEJ products resulting from single chiRNA targeting was performed using the SURVEYOR Mutation Detection kit (Transgenomic). Briefly, genomic DNA was isolated from individual embryos 24 hours after injection. Approximately 500-bp flanking the targeted Cas9 cleavage sites in *yellow* and *rosy* were amplified using Herculase DNA polymerase (Agilent Technologies) according to the manufacturer's protocol. The resulting product was purified using the Wizard SV Gel and PCR Clean-Up System (Promega). A total of 500 ng of purified PCR product was diluted in 1X Herculase reaction buffer to a final volume of 20  $\mu$ L. Heteroduplexes were formed using the following parameters: 95°C for 10 min, 95°C to 85°C ramping at rate of -2.0°C/sec, 85°C for 1 min, 85°C to 25°C at a rate of -0.3°C/sec with 1 min holds at 75°C, 65°C, 55°C, 45°C, 35°C, and 25°C. Following duplex annealing, 16  $\mu$ L of each sample (400 ng annealed duplexes) was mixed with 2  $\mu$ L 0.15 M MgCl<sub>2</sub>, 1  $\mu$ L SURVEYOR Enhancer S, 1  $\mu$ L SURVEYOR Nuclease S and incubated at 42°C for 60 min. The SURVEYOR reaction was stopped with 2  $\mu$ L of Stop solution, and the products were separated by polyacrylamide gel electrophoresis. The gel was stained with SYBR Gold (Invitrogen), and visualized on a GE ImageQuant.

### **Molecular characterization of engineered loci**

Genomic DNA was isolated from individual embryos 24 hours after injection. PCR was performed using primers flanking the targeted locus (Figure 1A, open arrows). Amplified products were purified and subcloned into pCR4-TOPO or pCRBluntII-TOPO (Invitrogen) prior to Sanger sequencing.

### **Screening**

To assess germline transmission of targeted genome modifications, adults that developed from injected embryos were individually crossed to  $y^1, w^1$ . The offspring of crosses were screened for 10 days after the first flies emerged for progeny with yellow cuticles. Transmission rates were calculated both as a percentage of parental crosses that produced one or more yellow progeny and as a percentage of total progeny. The total number of progeny screened was calculated by weight. Specifically, for each genome manipulation we pooled progeny daily and weighed 100 flies. The remaining flies were weighed and their number calculated based on the weight of the hand-counted flies. Transmission of expected events was confirmed by sequence analysis.

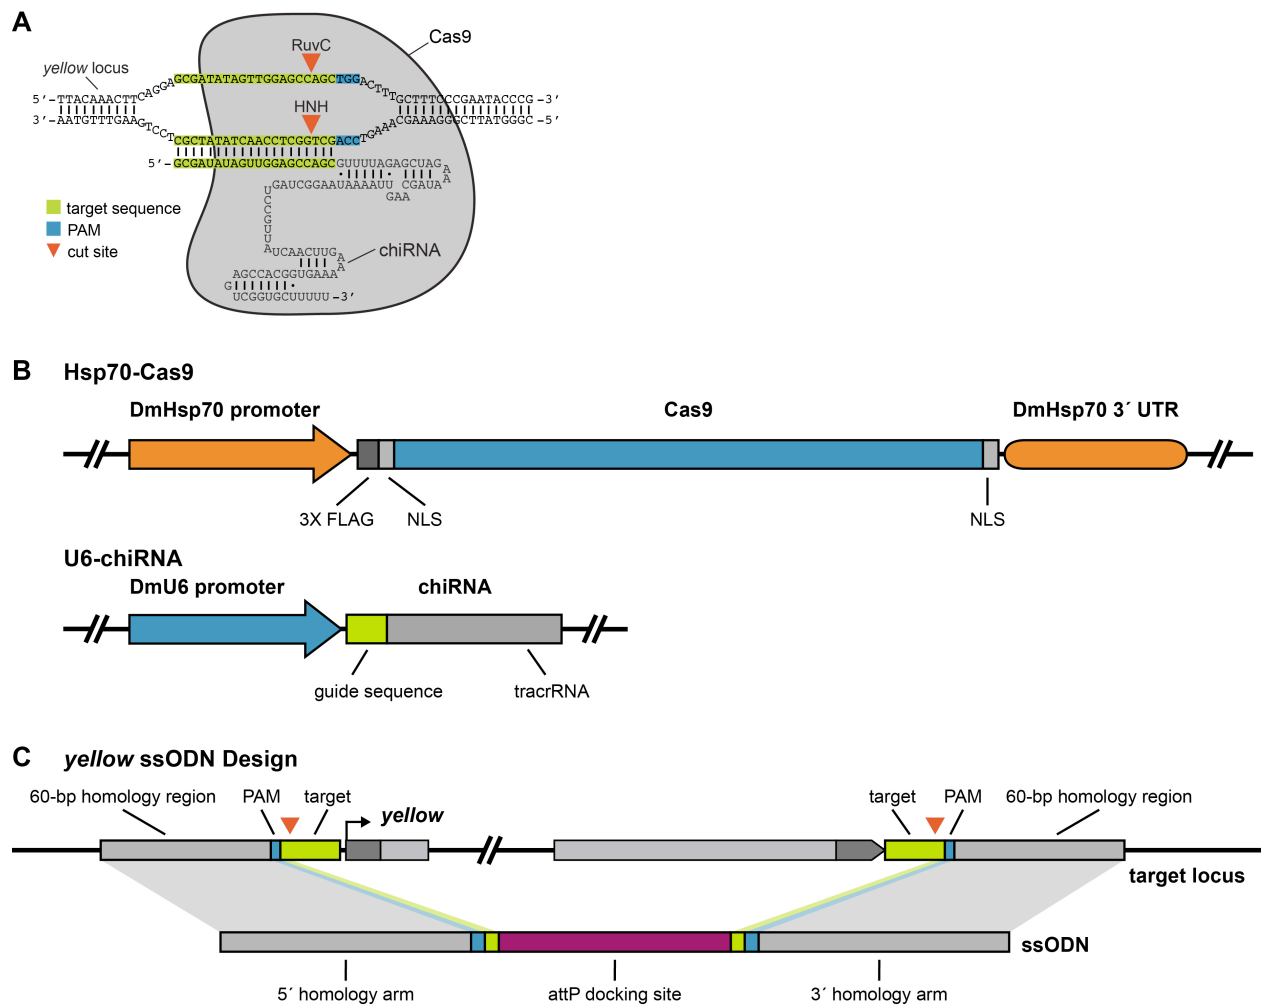

**Figure S1** CRISPR RNA/Cas9 molecular reagents used in this study

(A) Schematic of the modified CRISPR RNA/Cas9 system (based on Jinek et al., 2012) used in this study (YE1 is shown as an example). A chiRNA guides Cas9 to complementary target DNA. Target recognition requires 20-nt of homology and a 3-bp PAM sequence, NGG, at the 3' end of the genomic target sequence. Cas9 cleaves the complementary DNA strand via its HNH endonuclease domain, while its RuvC-like endonuclease domain cleaves the noncomplementary strand (red arrowheads), resulting in a DSB at the targeted site. (B) Cas9, derived from *Streptococcus pyogenes* and codon optimized for eukaryotic expression (CONG *et al.* 2013), was expressed under the control of the Drosophila *hsp70* promoter and 3' UTR. The chiRNAs utilized in this study consist of 20-nt of target-specific guide sequence followed by 76-nt of tracrRNA sequence as this chiRNA exhibited maximal activity in mammalian cells (Patrick Hsu and Feng Zhang, personal communication). The chiRNA is transcribed from the Drosophila snRNA:U6:96Ab promoter (WAKIYAMA *et al.* 2005). (C) ssODN donor templates contain 60-nt homology arms matching genomic sequence immediately adjacent to each site-specific cut flanking a 50-nt attP docking site for efficient subsequent manipulation of the targeted locus. Red arrowheads mark the predicted Cas9 cleavage sites. Note that the ssODN is designed such that neither it nor the modified locus will be CRISPR targets. Not to scale. More detailed information and protocols can be found at FlyCRISPR.molbio.wisc.edu.

## A. pHsp70-Cas9

DmHsp70 promoter and 3'UTR

3x Flag

NLS

Cas9

```
ATCCCCCTAGAATCCCAAACAAACTGGTTATTGTGGTAGGTCATTTGTTTGGCAGAAAGAAAA
CTCGAGAAATTTCTCTGGCCGTTATTCGTTATTCTCTCTTTTTCTTTTTGGGTCTCTCCCTCTCT
GACTAATGCTCTCTCACTCTGTACACAGTAAACGGCATACTGCTCTCGTTGGTTCGAGAGAG
CGCGCCTCGAATGTTTCGCGAAAAGAGCGCCGGAGTATAAATAGAGGCGCTTCGTCTACGGAGCG
ACAATTCAATTCAAACAAGCAAAGTGAACACGTCGCTAAGCGAAAGCTAAGCAAATAAACAAGC
GCAGCTGAACAAGCTAAACAATCTGCAGTAAAGTGCAAGTTAAAGTGAATCAATTAAGTAAC
CAGCAACCAAGTAAATCAACTGCAACTACTGAAATCTGCCAAGAAGTAATTATTGAATACAAGA
AGAGAACTCTGGGGGATCTGATCGATATGGACTATAAGGACCACGACGGAGACTACAAGGATCA
TGATATTGATTACAAAGACGATGACGATAAGATGGCCCCAAAGAAGAAGCGGAAGGTCGGTATC
CACGGAGTCCCAGCAGCCGACAAGAAGTACAGCATCGGCCTGGACATCGGCACCAACTCTGTGG
GCTGGGCCGTGATCACCGACGAGTACAAGGTGCCAGCAAGAAATTCAGGTGCTGGGCAACAC
CGACCGGCACAGCATCAAGAAGAACCCTGATCGGAGCCCTGCTGTTTCGACAGCGGCAGAACAGCC
GAGGCCACCCGGCTGAAGAGAACC GCCAGAAGAAGATACACCAGACGGAAGAACC GGATCTGCT
ATCTGCAAGAGATCTTCAGCAACGAGATGGCCAAGGTGGACGACAGCTTCTTCCACAGACTGGA
AGAGTCCTTTCCTGGTGGAAAGAGGATAAGAAGCACGAGCGGCACCCCATCTTCGGCAACATCGTG
GACGAGGTGGCCTACCACGAGAAGTACCCACCATCTACCACCTGAGAAAGAACTGGTGGACA
GCACCGACAAGGCCGACCTGCGGCTGATCTATCTGGCCCTGGCCACATGATCAAGTTCGGGG
CCACTTCTGATCGAGGGCGACCTGAACCCCGACAACAGCGACGTGGACAAGCTGTTTCATCCAG
CTGGTGCAGACCTACAACCAGCTGTTTCGAGGAAAACCCCATCAACGCCAGCGGCGTGGACGCCA
AGGCCATCCTGTCTGCCAGACTGAGCAAGAGCAGACGGCTGGAAAATCTGATCGCCCAGCTGCC
CGGCGAGAAGAAGAATGGCCTGTTTCGGAAACCTGATTGCCCTGAGCCTGGGCCTGACCCCAAC
TTCAAGAGCAACTTCGACCTGGCCGAGGATGCCAACTGCAGCTGAGCAAGGACACCTACGACG
ACGACCTGGACAACCTGCTGGCCAGATCGGCGACCAGTACGCCGACCTGTTTCTGGCCGCCAA
GAACCTGTCCGACGCCATCCTGCTGAGCGACATCCTGAGAGTGAACACCGAGATCACCAAGGCC
CCCCTGAGCGCCTCTATGATCAAGAGATACGACGAGCACCACCAGGACCTGACCCTGCTGAAAG
CTCTCGTGC GGCAGCAGCTGCCTGAGAAGTACAAAGAGATTTTCTTCGACCAGAGCAAGAACGG
CTACGCCGGCTACATTGACGGCGGAGCCAGCCAGGAAGAGTTCTACAAGTTCATCAAGCCATC
CTGGA AAAAGATGGACGGCACCAGGAACTGCTCGTGAAGCTGAACAGAGAGGACCTGCTGCGGA
AGCAGCGGACCTTCGACAACGGCAGCATCCCCACCAGATCCACCTGGGAGAGCTGCACGCCAT
TCTGCGGCGGCAGGAAGATTTTTACCCATTCTGAAGGACAACCGGGAAAAGATCGAGAAGATC
CTGACCTTCCGCATCCCCTACTACGTGGGCCCTCTGGCCAGGGGAAACAGCAGATTCGCCTGGA
TGACCAGAAAGAGCGAGGAAACCATCACCCCTGGAACCTTCGAGGAAAGTGGTGGACAAGGGCGC
TTCCGCCCAGAGCTTCATCGAGCGGATGACCAACTTCGATAAGAACCTGCCCAACGAGAAGGTG
CTGCCAAGCACAGCCTGCTGTACGAGTACTTCACCGTGTATAACGAGCTGACCAAAGTGA AAT
ACGTGACCGAGGGAATGAGAAAGCCCGCCTTCTGAGCGGCGAGCAGAAAAGGCCATCGTGGA
CCTGCTGTTCAAGACCAACCGGAAAGTGACCGTGAAGCAGCTGAAAGAGGACTACTTCAAGAAA
ATCGAGTGCTTCGACTCCGTGGAAATCTCCGGCGTGGAAAGATCGGTTCAACGCCTCCCTGGGCA
CATAACCAGATCTGCTGAAAATTATCAAGGACAAGGACTTCTGGACAATGAGGAAAACGAGGA
CATTCTGGAAGATATCGTGCTGACCCTGACACTGTTTGGAGACAGAGAGATGATCGAGGAACGG
CTGAAAACCTATGCCACCTGTTTCGACGACAAAGTGATGAAGCAGCTGAAGCGGCGGAGATACA
CCGGCTGGGGCAGGCTGAGCCGGAAGCTGATCAACGGCATCCGGGACAAGCAGTCCGGCAAGAC
AATCCTGGATTTCTGAAGTCCGACGGCTTCGCCAACAGAACTTCATGCAGCTGATCCACGAC
```

GACAGCCTGACCTTTTAAAGAGGACATCCAGAAAGCCCAGGTGTCCGGCCAGGGCGATAGCCTGC  
ACGAGCACATTGCCAATCTGGCCGGCAGCCCCGCCATTAAGAAGGGCATCCTGCAGACAGTGAA  
GGTGGTGGACGAGCTCGTGAAAAGTGATGGGCCGGCACAAGCCCAGAACATCGTGATCGAAATG  
GCCAGAGAGAACCAGACCACCAGAAGGGACAGAAGAACAGCCGCGAGAGAATGAAGCGGATCG  
AAGAGGGCATCAAAGAGCTGGGCAGCCAGATCCTGAAAGAACACCCCGTGGAAAACACCCAGCT  
GCAGAACGAGAAGCTGTACCTGTACTACCTGCAGAAATGGGCGGGATATGTACGTGGACCAGGAA  
CTGGACATCAACCGGCTGTCCGACTACGATGTGGACCATATCGTGCCTCAGAGCTTTCTGAAGG  
ACGACTCCATCGACAACAAGGTGCTGACCAGAAGCGACAAGAACCAGGGGCAAGAGCGACAACGT  
GCCCTCCGAAGAGGTCTGTGAAGAAGATGAAGAACTACTGGCCGGCAGCTGCTGAACGCCAAGCTG  
ATTACCCAGAGAAAGTTCGACAATCTGACCAAGGCCGAGAGAGGCGGCCTGAGCGAACTGGATA  
AGGCCGGCTTCATCAAGAGACAGCTGGTGGAAACCCGGCAGATCACAAGCACGTGGCACAGAT  
CCTGGACTCCCGGATGAACACTAAGTACGACGAGAATGACAAGCTGATCCGGGAAGTGAAAGTG  
ATCACCTGAAGTCCAAGCTGGTGTCCGATTTCCGGAAGGATTTCCAGTTTTACAAAGTGCGCG  
AGATCAACAACACTACCACCACGCCACGACGCCTACCTGAACGCCGTCGTGGGAACCGCCCTGAT  
CAAAAAGTACCCTAAGCTGGAAAGCGAGTTCGTGTACGGCGACTACAAGGTGTACGACGTGCGG  
AAGATGATCGCCAAGAGCGAGCAGGAAATCGGCAAGGCTACCGCCAAGTACTTCTTCTACAGCA  
ACATCATGAACTTTTTCAAGACCGAGATTACCCTGGCCAACGGCGAGATCCGGAAGCGGCCTCT  
GATCGAGACAAACGGCGAAACCGGGGAGATCGTGTGGGATAAAGGGCCGGGATTTTGCCACCGTG  
CGGAAAGTGCTGAGCATGCCCAAGTGAATATCGTGAAAAGACCGAGGTGCAGACAGGCGGCT  
TCAGCAAAGAGTCTATCCTGCCAAGAGGAAACAGCGATAAGCTGATCGCCAGAAAGAAGGACTG  
GGACCCTAAGAAGTACGGCGGCTTCGACAGCCCCACCGTGGCCTATTCTGTGCTGGTGGTGGCC  
AAAGTGAAAAGGGCAAGTCCAAGAACTGAAGAGTGTGAAAAGAGCTGCTGGGGATCACCATCA  
TGAAAAGAAGCAGCTTCGAGAAGAATCCCATCGACTTTCTGGAAGCCAAGGGCTACAAAGAAGT  
GAAAAGGACCTGATCATCAAGCTGCCTAAGTACTCCCTGTTTCGAGCTGGAAAACGGCCGGAAG  
AGAATGCTGGCCTCTGCCGGCGAACTGCAGAAGGGAAACGAACTGGCCCTGCCCTCCAAATATG  
TGAACCTCCTGTACCTGGCCAGCCACTATGAGAAGCTGAAGGGCTCCCCCGAGGATAATGAGCA  
GAAACAGCTGTTTGTGGAACAGCACAAAGCACTACCTGGACGAGATCATCGAGCAGATCAGCGAG  
TTCTCCAAGAGAGTGATCCTGGCCGACGCTAATCTGGACAAAGTGCTGTCCGCCTACAACAAGC  
ACCGGGATAAGCCCATCAGAGAGCAGGCCGAGAATATCATCCACCTGTTTACCCTGACCAATCT  
GGGAGCCCCTGCCGCCTTCAAGTACTTTGACACCACCATCGACCGGAAGAGGTACACCAGCACC  
AAAGAGGTGCTGGACGCCACCCTGATCCACCAGAGCATCACCGGCCTGTACGAGACACGGATCG  
ACCTGTCTCAGCTGGGAGGCGACAAAAGGCCGGCGGCCACGAAAAGGCCGGCCAGGCAAAAAA  
GAAAAGTAATCTAGAGATCTTCCATACCTACCAGTTCTGCGCCTGCAGCAATGGCAACAACGT  
TGCCCGGATCGAGGTCGACTAAGGCCAAAGAGTCTAATTTTTGTTTCATCAATGGGTTATAACAT  
ATGGGTTATATTATAAGTTTTGTTTTAAGTTTTTTGAGACTGATAAGAATGTTTTCGATCGAATATT  
CCATAGAACAACAATAGTATTACCTAATTACCAAGTCTTAATTTAGCAAAAATGTTATTGCTTA  
TAGAAAAAATAAATTATTTATTTGAAATTTAAAGTCAACTTGTCATTTAATGTCTTTGTAGACTT  
TTGAAAGTCTTACGATACAATTAGTATCTAATATACATGGGTTTCATTCTACATTCTATATTAGT  
GATGATTTCTTTAGCTAGTAATACATTTTAAATTATATTCGGCTTTGATGATTTTCTGATTTTTT  
CCGAACGGATTTTCGTAGACCCTTTCGATCTCATAATGGCTCATTTTTATTGCGATGGACGGTCA  
GGAGAGCTCCACTTTTGAATTTCTGTTTCGACAGACACCGCATTTGTAGCACATAGCCGGGACATC  
CGTTTTGGGGAGATTTTCCAGTCTCTGTTGCAATTGGTTTTTCGGGAATGCGTTGCAGGCGCATA  
CGCTCTATATCCTCCGAACGGCGCTGGTTGACCCTAGCATTTACATAAGGATCAGCAGCAAAAT  
TTGCCTCTACTTCATTGCCCGGAATCACAGCAATCAGATGTCCCTTTCGGTTACGATGGATATT  
CAGGTGCGAACCGCACACAAAGCTCTCGCCGCACACTCCACACTGATATGGTTCGCTCGCCCGTG  
TGCGCGCCGATATGGATCTTAAGGTCGTTGGACTGCACAAAGCTCTTGCTGCACATTTTGCAGG  
AGTACGGCCTTTGACCCGTGTGCAATCGCATGTGTGCGCCAGCTTGTTCTGCGAAATAAACTA  
ACGGGAATTCTGCAGCCCGGGGATCCGCGGCCG

## B. chiRNA expression vector pU6-BbsI-chiRNA

Dm snRNA:U6:96Ab promoter

BbsI sites for inserting guide sequence

crRNA repeat-derived sequence

tracrRNA

U6 terminator

```
GTTGACTTGCAGCCTGAAATACGGCACGAGTAGGAAAAGCCGAGTCAAATGCCGAATGCAGAG
TCTCATTACAGCACAATCAACTCAAGAAAACTCGACACTTTTTTACCATTTGCACTTAAATCC
TTTTTTATTTCGTTATGTATACTTTTTTTGGTCCCTAACCAAAACAAAACCAAACCTCTCTTAGTC
GTGCCTCTATATTTAAAACCTATCAATTTATTATAGTCAATAAATCGAACTGTGTTTTCAACAAA
CGAACAATAGGACACTTTGATTCTAAAGGAAAATTTGAAAATCTTAAGCAGAGGGTTCTTAAGA
CCATTTGCCAATTCTTATAATTCTCAACTGCTCTTTCCTGATGTTGATCATTATATAGGTATG
TTTTCTCAATACTTCGGGTCTTCGAGAAGACCTGTTTTAGAGCTAGAAATAGCAAGTTAAAAT
AAGGCTAGTCCGTTATCAACTTGAAAAAGTGGCACCGAGTCGGTGC
```

## C. yellow ssODN

5' and 3' homology arms

PAM

Target sequence corresponding to the nt that remain after cleavage

attP

```
GTTGTCTTTAAATATTCTTTACATCAATCGAGTGTGTGAGAATATACCCAAGTACCGTGTCTAC
GCCCCAACTGAGAGAACTCAAAGGTTACCCAGTTGGGGCACTACATCAGGTGGCTTATGCTG
TTCCCATAGATCGCCAACCTTTCGTTTTGTCTTCCATGATT
```

**Figure S2** Sequences of CRISPR RNA/Cas9 constructs

Annotated sequences of (A) codon-optimized Cas9 (Cong *et al.* 2013) under the control of the *Drosophila* *hsp70* promoter and 3' UTR. (B) chiRNA expression vector for generating site-specific, U6-driven chiRNAs (based on Cong *et al.*, 2013), and (C) the ssODN donor used to replace *yellow* with attP.

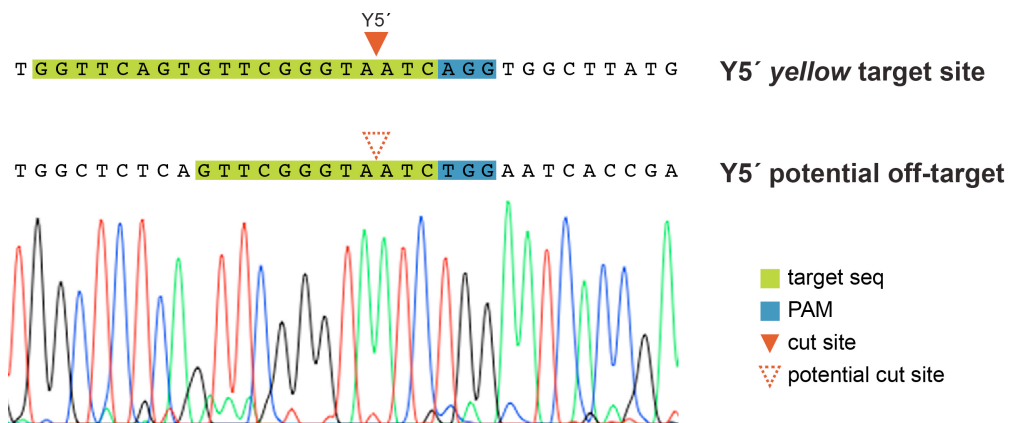

**Figure S3** Off-target analysis of germline transformants

The potential off-target site of Y5', based on the criteria established by Cong et al., 2013, is shown with a representative sequence trace indicating the presence of wild-type sequence at this site in germline transformants generated with the Y5' chiRNA. Note that Y3' and YE1 have no potential off-target sites that meet these criteria.

**Table S1** chiRNA sequences used to target *yellow* and *rosy*

| <b>Name</b> | <b>Target Sequence + PAM</b> | <b>Strand</b> | <b>Cleavage site</b> |
|-------------|------------------------------|---------------|----------------------|
| YE1         | GCGATATAGTTGGAGCCAGCTGG      | Sense         | + 97 bp              |
| Y5'         | GGTTCAGTGTTCCGGTAATCAGG      | Antisense     | - 307 bp             |
| Y3'         | GGTTAACATAATCCTACACCGG       | Sense         | + 4,336 bp           |
| R1          | GCACTTCACGATGTCTAACTCGG      | Sense         | + 8 bp               |
| R2          | GATCCGCAACGTCGCCTGTTTGG      | Sense         | + 1,843 bp           |

Sequences of the five different chiRNAs used to disrupt *yellow* and *rosy*. Target strand orientation is relative to the targeted gene. The site of the Cas9-generated DSB is indicated relative to the ATG translational start site of *yellow* or *rosy* (both genes have a single translational start site).



### Supporting references

Cong, L., F. A. Ran, D. Cox, S. Lin, R. Barretto *et al.*, 2013 Multiplex genome engineering using CRISPR/Cas systems. *Science* 339: 819-823.

Jinek, M., K. Chylinski, I. Fonfara, M. Hauer, J. A. Doudna *et al.*, 2012 A programmable dual-RNA-guided DNA endonuclease in adaptive bacterial immunity. *Science* 337: 816-821.

Wakiyama, M., T. Matsumoto and S. Yokoyama, 2005 *Drosophila* U6 promoter-driven short hairpin RNAs effectively induce RNA interference in Schneider 2 cells. *Biochem Biophys Res Commun* 331: 1163-1170.
