# Supplementary material
Source: PubMed Central journal article supplement (PMC3730909)
Supplement: d75541bb4814c4cc8613d81f9fddf2d2_genetics.113.152710-6.pdf [file d75541bb4814c4cc8613d81f9fddf2d2_genetics.113.152710-6.pdf]

**Table S1** chiRNA sequences used to target *yellow* and *rosy*

| <b>Name</b> | <b>Target Sequence + PAM</b> | <b>Strand</b> | <b>Cleavage site</b> |
|-------------|------------------------------|---------------|----------------------|
| YE1         | GCGATATAGTTGGAGCCAGCTGG      | Sense         | + 97 bp              |
| Y5'         | GGTTCAGTGTTCCGGTAATCAGG      | Antisense     | - 307 bp             |
| Y3'         | GGTAAACATAATCCTACACCGG       | Sense         | + 4,336 bp           |
| R1          | GCACTTCACGATGTCTAACTCGG      | Sense         | + 8 bp               |
| R2          | GATCCGCAACGTCGCCTGTTTGG      | Sense         | + 1,843 bp           |

Sequences of the five different chiRNAs used to disrupt *yellow* and *rosy*. Target strand orientation is relative to the targeted gene. The site of the Cas9-generated DSB is indicated relative to the ATG translational start site of *yellow* or *rosy* (both genes have a single translational start site).
